1 **Fast and accurate assembly of Nanopore reads via progressive error**  
2 **correction and adaptive read selection**

3 Ying Chen<sup>1, #</sup>, Fan Nie<sup>2, #</sup>, Shang-Qian Xie<sup>3, #</sup>, Ying-Feng Zheng<sup>1, #</sup>, Thomas Bray<sup>4</sup>, Qi Dai<sup>5</sup>,

4 Yao-Xin Wang<sup>5</sup>, Jian-feng Xing<sup>3</sup>, Zhi-Jian Huang<sup>6</sup>, De-Peng Wang<sup>7</sup>, Li-Juan He<sup>8</sup>, Feng Luo<sup>9, \*</sup>,

5 Jian-Xin Wang<sup>2, \*</sup>, Yi-Zhi Liu<sup>1, \*</sup>, and Chuan-Le Xiao<sup>1, \*</sup>

6 <sup>1</sup> State Key Laboratory of Ophthalmology, Zhongshan Ophthalmic Center, Sun Yat-sen University

7 #7 Jinsui Road, Tianhe District, Guangzhou, P.R. China

8 <sup>2</sup> School of Information Science and Engineering, Central South University, Changsha, 410083,

9 China

10 <sup>3</sup>Key Laboratory of Genetics and Germplasm Innovation of Tropical Special Forest Trees and

11 Ornamental Plants, Ministry of Education/ Hainan Key Laboratory for Biology of Tropical

12 Ornamental Plant Germplasm, College of Forestry, Hainan University, Haikou 570228, China

13 <sup>4</sup>Oxford Nanopore Technologies, Gosling Building, Edmund Halley Road, Oxford Science Park,

14 OX4 4DQ, UK

15 <sup>5</sup>College of Life Sciences and Medicine, Zhejiang Sci-Tech University, Hangzhou 310018,

16 People's Republic of China

17 <sup>6</sup>School of Marine Sciences/State Key Laboratory of Biocontrol/Southern Marine Sciences and

18 Engineering Guangdong Laboratory (Zhuhai), Sun Yat-sen University, Guangzhou, Guangdong,

19 People's Republic of China

20 <sup>7</sup>Nextomics Biosciences Co., Ltd

21 <sup>8</sup>BGI Genomics, BGI Shenzhen, Shenzhen, China

22 <sup>9</sup>School of Computing, Clemson University, Clemson, SC 29634-0974

23 \*To whom correspondence should be addressed:

24 Feng Luo. Tel: +01 864 633 6901. Email: [luofeng@clmson.edu](mailto:luofeng@clmson.edu);

25 Jian-Xing Wang. Tel: +86 20 87335131. Email: [jxwang@mail.csu.edu.cn](mailto:jxwang@mail.csu.edu.cn);

26 Yi-Zhi Liu. Tel: +86 20 66686996. Email: [liuyizh@mail.sysu.edu.cn](mailto:liuyizh@mail.sysu.edu.cn);

27 Chuan-Le Xiao. Tel: +86 20 66686996. Email: [xiaochuanle@126.com](mailto:xiaochuanle@126.com);

28 #These authors contributed equally to the manuscript as first authors.

29 Keywords: Oxford Nanopore sequencing, ultra-long reads, progressive error correction, *de-novo*

30 genome assembly

31

32

33 **Abstract**

34       Although long Nanopore reads are advantageous in *de novo* genome assembly,  
35 applying Nanopore reads in genomic studies is still hindered by their complex errors.  
36 Here, we developed NECAT, an error correction and *de novo* assembly tool designed  
37 to overcome complex errors in Nanopore reads. We proposed an adaptive read  
38 selection and two-step progressive method to quickly correct Nanopore reads to high  
39 accuracy. We introduced a two-stage assembler to utilize the full length of Nanopore  
40 reads. NECAT achieves superior performance in both error correction and *de novo*  
41 assembly of Nanopore reads. NECAT requires only 7,225 CPU hours to assemble a  
42 35X coverage human genome and achieves a 2.28-fold improvement in NG50.  
43 Furthermore, our assembly of the human WERI cell line showed an NG50 of 29 Mbp.  
44 The high-quality assembly of Nanopore reads can significantly reduce false positives  
45 in structure variation detection.

46

47

48

49 Reconstructing the genome sequence of a species or individual in a population is  
50 one of the most important tasks in genomics<sup>1-3</sup>. Single-molecule sequencing (SMS)  
51 technologies, developed by Pacific Bioscience and Oxford Nanopore, yield long reads  
52 that can significantly increase the number of solvable repetitive genome regions and  
53 improve the contiguity of assembly<sup>4-7</sup>. However, SMS reads usually have high error  
54 rates<sup>8</sup>. The two strategies currently used for *de-novo* genome assembly from SMS  
55 reads are “correction then assembly” and “assembly then correction.” Assemblers,  
56 such as Falcon<sup>9</sup>, Canu<sup>10</sup>, and MECAT<sup>11</sup>, first correct SMS reads and then assemble  
57 the genome using corrected reads. Conversely, assemblers, such as miniasm<sup>12</sup>, Flye<sup>13</sup>  
58 and wtdbg2<sup>14</sup>, assemble the genome using error-prone reads and then correct the  
59 assembled genome. Due to high computational cost of error correction, the  
60 “correction then assembly” approach is usually slower than “assembly then  
61 correction”. However, directly assembling the genome using error-prone SMS reads  
62 can increase assembly errors in the genome sequence, which affects the quality of  
63 reference genome and results in bias in downstream analysis, especially in  
64 complicated genome regions<sup>10, 15</sup>. On the other hand, the “correction then assembly”  
65 approach can provide highly continuous and accurate genome assemblies<sup>9-11</sup>.

66 The recently released R9 flow cell from Oxford Nanopore technology can  
67 generate reads that are up to 1M in length and with read N50 >100 kb, which may  
68 significantly improve the contiguity of assembly compared with those of assemblies  
69 using PacBio SMRT reads<sup>5-7, 16</sup>. However, errors in Nanopore reads are more complex  
70 than those in PacBio reads<sup>17, 18</sup> (see Results). Error correction tools in current

71 assemblers were originally designed for PacBio SMRT reads and cannot correct  
72 Nanopore reads efficiently and effectively. For example, correcting 30X coverage  
73 human Nanopore reads using error correction tool in Canu requires 29K CPU hours<sup>16</sup>.  
74 Moreover, the average identity of reads corrected by Canu is only 92%, which is far  
75 less accurate than that of corrected PacBio SMRT reads. These high error rates in  
76 corrected Nanopore reads can introduce mis-assemblies. Furthermore, high-error-rate  
77 subsequences in Nanopore reads are usually trimmed during error correction, which  
78 reduces both the length of original reads and contiguity of final assembly.

79 In this study, we developed NECAT, a novel error correction and *de novo*  
80 assembly tool designed to overcome the problem of complex errors in Nanopore reads.  
81 Unlike existing error correction tools that iteratively correct Nanopore reads, we  
82 developed a two-step progressive method for Nanopore-read correction. In the first  
83 step, NECAT corrects low error rate subsequences (LERS), while in the second step,  
84 it corrects high error rate subsequences (HERS), of the read. This progressive  
85 approach allows NECAT to quickly correct Nanopore reads, resulting in high  
86 accuracy of corrected reads. To fully take advantage of Nanopore-read length, we  
87 presented a two-stage assembler in NECAT. This assembler constructs contigs using  
88 corrected Nanopore reads, and then bridges the contigs using original raw reads. We  
89 also used an adaptive selection mechanism to choose high-quality supporting reads  
90 for each template read during error correction, and to select high-quality overlaps for  
91 each read during the read-overlap step. Our results indicate that NECAT achieves  
92 superior performance in error correction and *de novo* assembly of Nanopore reads.

## 93 **Results**

### 94 **Analysis of sequencing errors in Nanopore reads**

95 We analyzed sequencing errors in Nanopore reads of *E. coli*, *S. cerevisiae*, *A. thaliana*,  
96 *D. melanogaster*, *C. reinhardtii*, *O. sativa*, *S. pennellii* and *H. sapiens* (NA12878)  
97 (**Supplementary Note 1-5 and Supplementary Table 1-2**). As shown in  
98 **Supplementary Table 3**, average error rates of Nanopore reads for these eight  
99 species ranged from 12% (for *S. cerevisiae*) to 20.1% (for *A. thaliana*). Although  
100 average error rates of Nanopore reads are similar to those of PacBio SMRT reads,  
101 error rates in Nanopore reads are more broadly distributed than those of PacBio  
102 SMRT reads. The error rates of raw reads in the eight datasets used in our study were  
103 broadly distributed between 7-50% and centralized between 10-30% (**Figure 1A**).

104 Next, we analyzed sequencing errors in each Nanopore read. We partitioned each  
105 read into 500-bp long subsequences and counted the error rate of each subsequence.  
106 Our results show that the error rates in each read are also broadly distributed (**Figure**  
107 **1B**). Furthermore, on average, 3~23% of raw reads longer than 10 kb have high error  
108 rate subsequences (HERS) with error rates greater than 50% (**Supplementary Table**  
109 **3**). Overall, Nanopore reads produced by ultra-long library preparation techniques  
110 have a higher percentage of reads with HERS than those produced by normal library  
111 preparation techniques (23% vs. 3-11%). Additionally, the percentage of raw reads  
112 with HERS increased as read length increased (**Figure 1C**). Especially, in reads  
113 produced by ultra-long reads library preparation techniques, up to 45% of raw reads  
114 longer than 45 kb have HERS (**Figure 1C**). The HERS in Nanopore reads usually

115 force the error correction tool to break long reads into shorter fragments, which  
116 eliminates the advantage of using long Nanopore reads for *de novo* assembly.

117 Furthermore, error rates of Nanopore reads sampled from different genome  
118 locations shared the same distribution except for those of *A. thaliana*, which showed  
119 slight variations among genome locations (**Supplemental Figure 1**). These results  
120 indicate that Nanopore sequencing errors did not show genome-location bias.  
121 Therefore, a Nanopore dataset can contain both low and high error rate reads from the  
122 same location in a genome.

123 In summary, our analysis indicates that, unlike PacBio reads, Nanopore reads  
124 can contain HERS (especially in ultra-long raw reads), and show broad error rate  
125 distribution among reads and read subsequences.

### 126 **Adaptive selection of supporting reads for error correction**

127 To correct a Nanopore read, we first collected supporting reads that overlap with  
128 it, then constructed the corrected read using a consensus of  
129 multiple-sequence-alignment of overlapped reads. An overlapping-error-rate  
130 threshold is usually set to select supporting reads. Due to broad distribution of  
131 sequencing-error rates among Nanopore reads, it is difficult to select supporting reads  
132 using a single global overlapping-error-rate threshold. Setting a low  
133 overlapping-error-rate threshold, such as 0.3 used for PacBio reads, does not generate  
134 enough supporting reads to correct Nanopore reads with high error rates (>20%);  
135 consequently, numerous Nanopore reads cannot be corrected. Conversely, setting a  
136 high overlapping-error-rate threshold (such as 0.6) to correct the majority of

137 Nanopore reads results in markedly increasing of false supporting reads, which  
138 increases computational cost and reduce the accuracy of corrected reads. Furthermore,  
139 high overlapping-error-rate threshold can increase the number of high-error-rate  
140 supporting reads for low-error-rate template reads. This results in correcting  
141 low-error-rate template with high-error-rate supporting reads, which greatly reduces  
142 the accuracy of corrected low-error-rate reads.

143 To overcome the broad error-rate distribution of Nanopore reads, we used two  
144 overlapping-error-rate thresholds to select supporting reads after filtering via DDF  
145 scoring<sup>11</sup> and k-mer chaining<sup>19</sup> (**Online Methods**). First, we used a global  
146 overlapping-error-rate threshold to maintain the overall quality of supporting reads.  
147 Then, for each template read, we set an individual overlapping-error-rate threshold.  
148 The candidate reads were filtered if their alignment error rates were greater than either  
149 global or individual overlapping-error-rate thresholds. For low-error-template reads,  
150 the individual overlapping-error-rate threshold is less than the global threshold.  
151 Conversely, for high-error-rate template reads, the individual overlapping-error-rate  
152 threshold is greater than the global threshold. Using both global and individual  
153 overlapping-error-rate thresholds, we were able to maintain the quality of supporting  
154 reads for both low and high-error-rate template reads, thereby improving the accuracy  
155 of corrected reads. High-error-rate template reads that did not have enough supporting  
156 reads were discarded without correction.

157 **Progressive error correction of Nanopore reads**



158 The supporting reads for error correction are selected according to average error rate  
159 of each template read. Since error rates for subsequences of each Nanopore read are  
160 also broadly distributed (**Figure 2A**), overlapping error rate between supporting reads  
161 and HERS can exceed the global threshold 0.5, which can affect the accuracy of  
162 corrected subsequences. Therefore, we developed a progressive method for correcting  
163 error prone Nanopore reads in two steps (**Online Methods**). We first corrected  
164 low-error-rate subsequences in a template read (**Figure 2B**). Then, we corrected  
165 high-error-rate subsequences (**Figure 2C**). In the first step, both corrected and  
166 uncorrected subsequences were outputted as a corrected read for the next step. After  
167 the first step, we corrected most Nanopore reads to high accuracy. This allowed us to  
168 obtain increased number of low-error supporting reads for high-error subsequences in  
169 the second step, thereby helping to correct high-error subsequences. After the second  
170 step, we outputted only the corrected subsequences. If a subsequence in a template  
171 read could not be corrected in the second step, it had either a high error rate or low  
172 coverage. Thus, one template read could be broken into multiple corrected reads.

173 Usually, twelve supporting reads are enough for error correction. Performing  
174 local alignments of supporting reads to template is computationally expensive,  
175 especially for long template reads. Although we selected 200 supporting reads for  
176 each template read, it is unnecessary to align all these supporting reads when there are  
177 enough reads available for error correction. Thus, we used a coverage count array  
178 (CCA) to record the number of supporting reads that covered each base of the  
179 template read. For template read covered by a sufficient number of support reads, we

180 did not perform local alignment of supporting reads to this region anymore ([Online](#)  
181 [Methods](#)).

### 182 **Progressive assembly of Nanopore reads**

183 The long length of Nanopore reads is a significant advantage for *de novo* genome  
184 assembly. However, HERS inside long Nanopore reads usually fail to be corrected,  
185 leading to the splitting of long Nanopore reads into several shorter corrected reads.  
186 Using only corrected reads for genome assembly abolishes the advantage presented  
187 by the long length of Nanopore reads. In this study, we developed a two-step  
188 progressive genome assembler for Nanopore reads. In the first step, we generated  
189 high quality contigs using corrected reads ([Figure 2D](#)). In the second step, we bridged  
190 the contigs using original Nanopore reads to generate final scaffolds ([Figure 2E](#)). The  
191 lost contiguity in contigs, caused by HERSs in raw reads, is thereby filled in the  
192 second step of the process. Therefore, genome contiguity is improved by maximizing  
193 the usage of all raw reads. Our two-step assembly process is similar to process using  
194 SMS reads for scaffolding<sup>20</sup>.

195 Meanwhile, even after error correction, sequencing error rates of corrected  
196 Nanopore reads (1.5-9%) are still higher than those of corrected PacBio reads (less  
197 than 1%). Moreover, the error rates of corrected reads also show a relatively broad  
198 distribution ([Supplementary Note 6 and Supplementary Table 4](#)). To obtain high  
199 quality contigs, we needed to select high-quality overlaps between corrected reads  
200 because low-quality overlaps increase the difficulty of assembly and introduce errors  
201 into assembly results. Similar to the process used for selecting supporting reads for  
202 error correction, we employed both global and individual thresholds to overcome the  
203 broad-error-rate distribution for the filtering of low-quality overlaps ([Online](#)  
204 [Methods](#)).

## 205 **Performance of NECAT error correction**

206 We assessed the performance of NECAT error correction using Nanopore raw reads  
207 of seven species: *E.coli*, *S. cerevisiae*, *D. melanogaster*, *A. thaliana*, *C. reinhardtii*, *O.*  
208 *sativa*, and *S. pennellii* with respect to correction speed, corrected data size, accuracy  
209 and continuity of corrected reads, as well as the number of reads with HERS in  
210 corrected reads (**Supplementary Note 6**). As shown in **Table 1**, NECAT correction  
211 speeds were 2.1-16.5 times faster than those of Canu for Nanopore reads of these  
212 seven species. The sizes of corrected reads for *E.coli*, *S. cerevisiae*, *D. melanogaster*,  
213 *A. thaliana*, *C. reinhardtii*, *O. sativa*, and *S. pennellii* were 102.2%, 83.4%, 90.6%,  
214 92.5%, 100.3%, 100.7% and 91.2% of their raw reads, respectively, while Canu only  
215 corrected the longest 40X raw reads and obtained 15.9%, 39.8%, 57.7%, 84.1%,  
216 31.1%, 24.0%, and 28.3% corrected reads from their raw reads, respectively.

217 NECAT was able to obtain high-accuracy corrected reads. After the first step,  
218 average error rates for *E.coli*, *S. cerevisiae*, *D. melanogaster*, *A. thaliana*, *C.*  
219 *reinhardtii*, *O. sativa*, and *S. pennellii* datasets were 4.27%, 3.08%, 7.03%, 11.35%,  
220 4.40%, 6.45%, and 9.23% respectively; these were less than the average error rates of  
221 reads corrected by Canu, which were 7.06%, 3.13%, 8.15%, 12.05, 5.35%, 7.99%,  
222 and 9.69% respectively. After the second step, average error rates for seven datasets  
223 were further reduced to 2.23%, 1.53%, 4.89%, 9.01%, 1.99%, 4.66%, and 6.45%,  
224 respectively.

225 The maximum overlapping error rate between corrected reads is usually set to 10%  
226 during assembly. Thus, the higher the percentage of corrected reads having less than 5%

227 error, the more reads can be used for assembly. As shown in [Table 1](#), the percentages  
228 of NECAT's corrected reads having error rate less than 5% error for seven data sets  
229 were 99.34%, 95.04%, 72.03%, 45.85%, 95.18%, 74.62%, and 63.04% respectively,  
230 which were significantly higher than those of reads corrected by Canu.

231 The progressive correction strategy in NECAT also allowed us to correct more  
232 HERS and maintain the contiguity of reads. N50s for NECAT-corrected reads of the  
233 seven datasets were 105.1%, 90.5%, 98.0%, 100.9%, 103.7%, 100.4%, and 96.3%,  
234 respectively, of N50s for their corresponding raw reads, indicating that NECAT could  
235 preserve the contiguity of raw reads. Conversely, N50s for the reads corrected by  
236 Canu were 91.9%, 30.4%, 85.8%, 91.8%, 99.0%, 97.7% and 87.3% of the  
237 corresponding raw reads, which was less than those of NECAT-corrected reads.  
238 Another evidence that progressive correction strategy in NECAT can improve the  
239 correction of HERS is that the number of reads with HERS has been reduced. After  
240 two-step correction using NECAT, the numbers of reads containing HERS in the  
241 seven corrected datasets were 1, 268, 3,481, 7,158, 278, 3,511, and 5,445 respectively,  
242 while Canu-corrected datasets had 1, 4,820, 6,523, 8,722, 726, 4,413 and 5,511 reads  
243 containing HERS. These results indicate that NECAT outperformed Canu in  
244 correcting sequencing errors in Nanopore raw reads.

#### 245 **Performance of NECAT *de novo* assembler**

246 We compared NECAT to two widely used correct-then-assemble pipelines, Canu and  
247 Canu+smartdenovo, for *de novo* assembly of Nanopore reads ([Supplementary Note](#)  
248 [7](#)). We assembled genomes of *E. coli*, *S. cerevisiae*, *A. thaliana*, *D. melanogaster*, *C.*

249 *reinhardtii*, *O. sativa* and *S. pennellii* using the longest 40X reads of each dataset, and  
250 assembled 35X Nanopore data for the human NA12878 genome using NECAT only.  
251 As shown in **Table 2**, NECAT was 8.3-258.2 times faster than Canu, while showing  
252 8.8-577.5 times speedup during the assembly step. Canu employs a high overlapping  
253 threshold (14.4%) in its overlapIncore tool for Nanopore reads (a low threshold of 6%  
254 is used for assembling PacBio reads), which may greatly increase the time cost of  
255 local alignments. The Canu+smartdenovo pipeline replaces the assembly step of Canu  
256 with smartdenovo, which significantly reduces running time. NECAT was still  
257 3.2-57.0 times faster than Canu+smartdenovo on seven datasets. The high accuracy of  
258 corrected reads outputted by NECAT allowed us to use a more rapid overlapping  
259 approach.

260 We then assessed the quality of assembled contigs with respect to assembly size,  
261 NG50, number of contigs, and average number of contigs > 200 bps per chromosome  
262 (ctg/chr). For *E. coli*, all three pipelines recovered the complete genome in just one  
263 contig. For *S. cerevisiae*, NECAT outperformed Canu and Canu+smartdenovo with  
264 101% assembly performance and a near perfect contiguity with only 19 contigs. For *A.*  
265 *thaliana*, NECAT reported 136 contigs and an NG50 of 48% assembly performance,  
266 which was similar to that of Canu+smartdenovo (47% assembly performance) and  
267 markedly better than that of Canu (28% assembly performance). For *D. melanogaster*,  
268 NECAT reported 277 contigs and obtained the best NG50 performance (71%  
269 assembly performance) compared with those of Canu (14% assembly performance)  
270 and Canu+smartdenovo (57% assembly performance). For *C. reinhardtii*, NECAT

271 reported 54 contigs and the best NG50 performance (79% assembly performance).  
272 For *O. sativa*, NECAT reported 120 contigs and the best NG50 performance (31%  
273 assembly performance), which was markedly better than those of Canu (16%  
274 assembly performance) and Canu+smartdenovo (12% assembly performance). For *S.*  
275 *pennellii*, NECAT reported 1344 contigs and the best NG50 performance (190%  
276 assembly performance), which was 1.90 and 2.88 times greater than those of  
277 Canu+smartdenovo (100% assembly performance) and Canu (66% assembly  
278 performance). For human NA12878, NECAT report 1494 contigs and 16.93 Mbp  
279 NG50 (30% assembly performance), which was 2.43 times longer than that reported  
280 by Canu. Furthermore, NECAT assembled the human NA12878 genome in only 4.7  
281 days on a single 64-threaded computer.

282 We next assessed the effect of contig-bridging in NECAT assembly. As shown  
283 in **Table 3**, the number of contigs was significantly reduced in the assembly of *A.*  
284 *thaliana*, *D. melanogaster*, *C. reinhardtii*, *O. sativa*, *S. pennellii* and *H. sapiens*  
285 genomes after contig-bridging of raw reads. For *D. melanogaster* and *S. pennellii*  
286 contig-bridging also significantly increased the N50 of assembly. These results  
287 indicate that contig-bridging can significantly improve the contiguity of assembly.

288 We further compared NECAT assembler with widely used assemble-then-correct  
289 assemblers: Miniasm, Smartdenovo, Wtdbg2, and Flye (**Supplementary Text 1 and**  
290 **Note 7**). NECAT has similar time costs as those assemble-then-correct assemblers,  
291 but obtains better assembly results, especially for complex genomes (**Supplementary**  
292 **Text 1**). We also validated our assemblies by comparing them to reference genomes.

293 The quality of NECAT-generated assemblies were comparable to those of the other  
294 correct-then-assemble pipelines and better than assemble-then-correct assemblers  
295 ([Supplementary Text 2](#)).

### 296 **De novo genome assembly of retinoblastoma cell line WERI**

297 To further evaluate the performance of NECAT in large-genome assembly, we  
298 sequenced a cell line called WERI, which is derived from human retinoblastoma<sup>21</sup>.  
299 We generated 210 Gb (82 folds) of raw reads from three flowcells using Nanopore  
300 PromethION. The WERI genome assembled by NECAT has an N50 of 29M. To the  
301 best of our knowledge, this is the best N50 value for the assembly of human genome  
302 using the general library of the Nanopore sequencing platform.

303 We aligned the WERI assembly to human reference genome hg38 using  
304 MUMmer (v4.0)<sup>22</sup>. The dotplot figure shows that the WERI assembly is structurally  
305 consistent with reference genome except for minor structural variations  
306 ([Supplementary Note 8](#) and [Supplementary Figure 2](#)) and the tiling figure shows  
307 the continuity of the assembly ([Figure 3](#)). We also used bowtie2<sup>23</sup> to align an Illumina  
308 dataset for the WERI cell line onto a WERI assembly and hg38 human reference  
309 genome. The mapping rate of the WERI assembly (99.1%) was better than that of  
310 hg38 human reference genome (98.0%).

311 We then identified and validated structural variants (SVs) in the WERI assembly.  
312 We detected 11,725 SVs ( $\geq 10$  bp) in the WERI assembly by aligning it to hg38  
313 human reference genome using Nummer (v4.0). We also detected SVs from raw  
314 Nanopore long reads and Illumina short reads for the WERI cell line using Sniffles<sup>24</sup>

315 and LUMPY<sup>25</sup>, respectively (**Supplementary Note 8**). 7210 SVs are commonly  
316 detected using WERI assembly and raw Nanopore reads, while only 1117 SVs are  
317 commonly detected using WERI assembly and NGS (**Supplementary Figure 3 and**  
318 **Supplementary Table 5**). Furthermore, 90% of unique small SVs (<1000 bp)  
319 detected using Nanopore raw reads were able to be found in the WERI assembly,  
320 indicating that the assembly can reduce false positives for small SVs (<1000 bp)  
321 (**Supplementary Table 5**).

322 Next, we examined genes associated with the identified SVs. We found 2843  
323 annotated genes associated with 7210 SVs identified using both WERI assembly and  
324 raw Nanopore reads. 209 of 2843 genes are reported in Phenolyzer<sup>26</sup> and are  
325 associated with retinoblastoma (**Supplementary Table 6**). Among 66 genes, the gene  
326 *PRKCB*, which is scored as high as 0.8901 in Phenolyzer<sup>26</sup>, was reported to be  
327 involved in retinoblastoma protein phosphorylation<sup>27</sup>. Among the 209 genes, there are  
328 eight genes (*AATF*, *PRKCB*, *PRMT2*, *FRK*, *PIK3RI*, *CUX1*, *RAC2*, *IGF1*) with a  
329 Phenolyzer score greater than 0.5, and six of eight genes are associated with  
330 retinoblastoma as reported in PubMed. These results indicate that NECAT can  
331 provide high quality assembly for reliable identification of SVs.

## 332 **Discussion**

333 Currently, applying Nanopore reads in genomic studies is difficult because of the  
334 complex errors within these reads. In this study, our analyses have shown that  
335 Nanopore reads contain high-error rate subsequences, and errors are broadly  
336 distributed among Nanopore reads and in subsequences of a read. This broad error



337 distribution complicates selection of supporting reads during the error-correcting  
338 process. In traditional error-correction methods, the threshold used to select  
339 supporting reads can be set too strict or too lenient; the former cannot select enough  
340 supporting reads for correction, while the latter generates too many low-quality reads  
341 that affect the accuracy of corrected reads. Furthermore, traditional error correction  
342 methods cannot correct the high-error-subsequences in Nanopore reads and generally  
343 break Nanopore reads into multiple short corrected reads.

344 In this study, we developed NECAT, which includes novel methods such as  
345 progressive error correction, adaptive supporting reads and alignment selection, and  
346 two-stage assembly, to overcome the errors characteristic of Nanopore reads. The  
347 novel error-correction tool in NECAT, which is 2.1-16.5 times faster than that of  
348 Canu, can correct Nanopore reads to high accuracy, while maintaining the contiguity  
349 of Nanopore reads. The novel assembly tool in NECAT is at least 1.4 times faster  
350 than other assembly pipelines with enhanced or comparable assembly performance.  
351 The high performance shown by NECAT suggests that the high error rate of  
352 Nanopore reads can be overcome by the development of new algorithms with respect  
353 to error characteristics.

354 Structural variations identified via raw Nanopore reads usually have a high  
355 false-positive rate. Here, we show that these false positives can be reduced  
356 considerably by using a high-quality assembly of Nanopore reads for detection of  
357 structure variation. Our results show that NECAT is a useful tool for error correction  
358 and assembly of Nanopore reads, and for detection of structure variation.

359

360

361

362 **Data sources.** We used nine datasets to evaluate the performance of NECAT. Among  
363 these datasets, those for *Saccharomyces cerevisiae*, *Oryza sativa* and *Homo sapiens*  
364 (the WERI human retinoblastoma cell line) were generated using our in-house  
365 sequencing, while the other four were obtained from public websites. The details on  
366 the data used in this study are reported in [Supplementary Notes 1-4](#).

367

368

369 **Accession codes.** All processed files for assembly and analysis code used in this  
370 study are available from <http://www.tgsbioinformatics.com/necat>. All source codes  
371 for NECAT are available from <https://github.com/xiaochuanle/NECAT>.

372

### 373 **ACKNOWLEDGMENTS**

374 We thank all those who generated and freely released the data analyzed in our present  
375 study. This study was funded in part by the National Natural Science Foundation of  
376 China (grant numbers 31871326, 31701146, 91953122, 6832019, 61420106009,  
377 81530028, 81721003). We thank the Local Innovative and Research Teams Project of  
378 Guangdong Pearl River Talents Program, Clinical Innovation Research Program of  
379 Guangzhou Regenerative Medicine and Health Guangdong Laboratory (grant number  
380 2018GZR0201001); the State Key Laboratory of Ophthalmology, Zhongshan  
381 Ophthalmic Center, Sun Yat-sen University. This work was supported in part by the

382 U. S. National Institute of Food and Agriculture (NIFA; grant number  
383 2017-70016-26051) and U.S. National Science Foundation (NSF; grant number  
384 ABI-1759856) to F. L.

385

### 386 **AUTHOR CONTRIBUTIONS**

387 C.L.X., Y.Z.L., J.X.W., and F.L. conceived and designed this project. Y.C. and C.L.X.  
388 conceived, designed, and implemented the consensus algorithm. F.N. and C.L.X.  
389 conceived, designed, and implemented the progressive assembly algorithm. F.N. and  
390 Y.C. integrated all the programs into the NECAT pipeline and provided  
391 documentation. S.Q.X., C.L.X., Y.X.W., J.F.X. and Q.D. ran analyzed genome  
392 assemblies and analyzed the performance of algorithms developed in this study. T.B.,  
393 Z.J.H., D.P.W. and L.J.H. coordinated data release and assisted with executing the  
394 pipeline. F. L., Y.C., and F.N. performed theoretical analysis of the algorithms  
395 developed in this study. F.L., C.Y., F.N., S.Q.X., Y.F.Z. and C.L.X. wrote the  
396 manuscript. All authors have read and approved the final version of this manuscript.

397

### 398 **COMPETING FINANCIAL INTERESTS**

399 The authors have no competing financial interests to declare.

400

401

## 402 **ONLINE METHODS**

403 **The architecture of NECAT.** The NECAT pipeline was designed as a  
404 high-performance assembler for Nanopore reads. To overcome the high-error-rate of  
405 Nanopore reads, we developed several novel methods, including progressive error  
406 correction, adaptive supporting reads and alignment selection, and two-step assembly.  
407 The NECAT pipeline contains four modules ([Supplementary Figure 4](#)): preprocessing,  
408 correction, trimming, and assembly. The preprocessing module filters short and  
409 ill-formed reads. The correction module uses a progressive strategy to correct  
410 Nanopore reads in two steps. The trimming module removes low-quality  
411 subsequences from corrected reads. The assembly module builds a string graph to  
412 assemble the genome in two steps. These four modules can be run in series to finish  
413 assembly, or can be operated independently. Currently, NECAT is the most efficient  
414 assembler for large genomes from Nanopore reads. NECAT also significantly  
415 improved the contiguity of the assembled genome.

416 **Progressive error correction of Nanopore reads.** The broad distribution of  
417 sequencing-error-rates among Nanopore reads, and within a single Nanopore raw read,  
418 is the reason for why traditional iterative error-correction methods usually fail with  
419 Nanopore data. In this study, we develop a novel method for correcting Nanopore  
420 reads. Our progressive error correction method involves two steps. First, we correct  
421 the low-error-rate subsequences (LERS) in a read. Then, we correct the  
422 high-error-rate subsequences (HERS) in that read using a more sensitive approach.  
423 Both steps include the same four sub-steps: i) selection of candidate reads, ii)

424 determination of alignment-quality threshold, iii) selection of matched reads, and iv)  
425 correction of the read. The sub-steps i, ii, and iv are the same for both steps. We use  
426 different methods to select matched reads for each template to be corrected in  
427 sub-step iii of the two steps. In first step, we use a strict selection method to choose  
428 matched reads for the low-error-rate portions of template read. In second step, we use  
429 a lenient method to choose matched reads for the high-error-rate portions of template  
430 read.

431 **Selection of candidate reads.** For each read to be corrected, we select candidate  
432 reads that have overlap with that read. For each pair of reads, we first use the distance  
433 difference factor (DDF<sup>11</sup>) to select a seed k-mer pair with the highest score, which  
434 serves as a reliable start position for local alignment. However, the wide distribution  
435 of error rates decreases the sensitivity of the DDF score for two k-mer pairs that are  
436 far apart; this may introduce false positives ([Supplementary Figure 5A](#)). To remove  
437 false positives, we gather all k-mer pairs that support the seed k-pair during DDF  
438 scoring. We sort all k-mer pairs, including the seed k-mer pair, with respect to their  
439 positions and then chain them together<sup>19</sup>. The chaining process examines the relative  
440 positions of k-mer pairs and helps to filter out false positives ([Supplementary Figure](#)  
441 [5B](#)). We then update the DDF score of the seed k-mer pair with remaining k-mer pairs,  
442 which further improves the sensitivity of candidate selection. We record the positions  
443 of the first and last k-mer pairs in the chain as the approximate mapped positions of  
444 candidate read. These two positions, together with the DDF score of the seed k-mer  
445 pair, are used for further filtering of redundant candidates and identifying HERS.

446 **Determination of individual alignment-quality threshold for each template read.**

447 We select high-quality supporting reads that are used for the correction of each  
448 template read. However, broad error rate distribution makes it difficult to use a single  
449 global threshold for selection of supporting reads. Besides setting a global  
450 overlapping-error-rate threshold to 0.5, we also compute a local individual  
451 overlapping-error-rate threshold for each template read. For each template read, we  
452 use 50 candidate reads with top DDF scores for local alignments. If a local alignment  
453 contains more than 60% of template or candidate read length, we record the alignment,  
454 and the difference between template and candidate read. If we have  $n(0 \leq n \leq 50)$   
455 recorded alignments and their differences are  $d_1, d_2, \dots, d_n$ , We compute their  
456 average difference  $d_0 = \sum_{i=1}^n d_i / n$  and standard deviation  $D = \sqrt{\sum_{i=1}^n (d_i - d_0)^2}$ .  
457 Then, we set the alignment quality threshold as  $d = d_0 - 5D$ . This threshold provides  
458 a lower alignment quality bound for low error template reads.

459 **Selection of matched reads.** For each read template, we select 200 candidate reads  
460 with top DDF scores for local alignment. We use different alignment methods in first  
461 and second steps. In the first step, we use blockwise alignment algorithm for aligning  
462 supporting reads to the template read. We perform local alignment from the seed  
463 k-mer pair in both directions. Thus, we first obtain two semi-global alignments, and  
464 then the two alignments are merged into one. Starting from the seed k-mer pair, we  
465 partition both template and candidate reads into equal-sized blocks 500 bp in length.  
466 We then use the Edlib algorithm<sup>28</sup> to successively align each pair of blocks. The  
467 aligning process terminates if the alignment error between a pair of blocks is greater

468 than 50%, or if the alignment algorithm reaches the end of a template or candidate  
469 read. Because blockwise alignment terminates when either block from template or  
470 candidate has a high error rate, we can only obtain alignment between low-error-rate  
471 subsequences in this step.

472 In the second step, we use multiple alignment methods to obtain long  
473 alignments between templates and candidate reads. We first use the blockwise  
474 approach to align candidate reads to a template. If blockwise alignment terminates  
475 early due to presence of a high-error-rate region inside the template or candidate read,  
476 we use the DALIGN algorithm<sup>29</sup> to re-align the candidate read to template. However,  
477 alignments produced via DALIGN, running with a large difference threshold of 0.5,  
478 are usually too coarse. To refine the alignment result of DALIGN, we then use the  
479 Edlib algorithm to perform a global alignment on the mapped subsequences output by  
480 DALIGN to get a more correct alignment.

481 Performing a local alignment of supporting reads to template is  
482 computationally expensive, especially for long-template reads. Usually only dozens of  
483 alignments are enough for error correction. Thus, it is unnecessary to align all 200  
484 candidate reads if we have enough supporting reads for error correction. Here, we use  
485 a coverage count array (CCA), which is an integer array possessing the same length as  
486 that of template read, to record the number of candidate reads that cover each base of  
487 the template read. Prior to aligning a candidate read to the template read, we examine  
488 the values of CCA elements between the mapped positions for the approximate start  
489 and end of candidate read on a template. If all these values are greater than a user set

490 threshold  $C$ , we would know that the corresponding region in template read has been  
491 covered by enough candidate reads and there is no need to perform the local  
492 alignment of this candidate read. If the alignment difference is less than the alignment  
493 quality threshold  $d$ , we would increase every value of CCA between the start and end  
494 template mapped positions by one. We use a default value of 12 for threshold  $C$ .

495 **Correction of Nanopore reads.** After selecting matched candidate reads, we use the  
496 FALCON-sense consensus algorithm<sup>9</sup> to correct each subsequence of the template  
497 read that is covered by enough candidate reads. In the first step, we replace these  
498 subsequences with corrected subsequences. Then, we output the whole template,  
499 including corrected subsequences and uncorrected subsequences, as a corrected read  
500 for the next step. HERS are corrected in the next step. In the second step, we only  
501 output corrected subsequences, meaning that one template may produce more than  
502 one corrected read. If a subsequence in a template read cannot be corrected in the  
503 second step, it either has too high of an error rate or low coverage.

504 **Trimming of low-quality subsequences.** Long Nanopore reads may still contain  
505 HERS even after error correction, which can greatly affect the quality of assembly.  
506 Thus, low-quality subsequences need to be trimmed before assembly. We only select  
507 40X coverage longest corrected reads for trimming and future assembly. First, we  
508 perform pairwise alignment on selected Nanopore reads using the trimming module of  
509 MECAT<sup>11</sup>. Because even corrected Nanopore reads may have a relatively high error  
510 rate, we use the sensitive DALIGN algorithm to replace the original diff algorithm in  
511 the MECAT trimming module before performing local alignments. After pairwise



512 alignment, we gather high-quality overlaps with more than 90% identity for each read.  
513 If every residue of a read is covered by at least one overlap, the read is designated as a  
514 complete read. On the other hand, if there are subsequences without overlap coverage  
515 in a read, we trim it to its longest covered subsequence, which is called a trimmed  
516 read.

517 After trimming, the reads are usually subjected to another pairwise alignment.  
518 Our experiments show that less than 10% of corrected reads are trimmed, therefore, it  
519 is unnecessary to pairwise align 90% of untrimmed reads. Thus, we store complete  
520 reads and trimmed reads separately after trimming. Pairwise alignments are only  
521 performed between complete reads and trimmed reads, and between trimmed reads.  
522 The results of these pairwise alignment, together with complete reads, trimmed reads,  
523 and results of original pairwise alignments between complete reads, are fed into the  
524 assembly module.

525 ***De novo* assembly of Nanopore reads.** Although the long length of Nanopore reads  
526 helps improve genome assembly, the relatively high error rate of these reads renders  
527 genome assembly difficult. Here, we developed a new assembly tool that is  
528 particularly useful for Nanopore reads because it can overcome the high error rate of  
529 these reads. Our assembly module in NECAT consists of three steps: filtering of  
530 low-quality read overlaps, contig assembly, and contig bridging. We use multiple  
531 quality-control measures to filter out low-quality overlaps between Nanopore reads.  
532 Then, we construct a directed string graph and solve the graph to generate contigs.  
533 Finally, we bridge the contigs using original reads to generate the final scaffolds.

534 **Filtering of low-quality read overlaps.** Low-quality overlaps complicate assembly  
535 and introduce errors into assembly results. In NECAT, we use multiple thresholds to  
536 control the identity, overhang, and coverage of overlaps in order to filter out  
537 low-quality overlaps. For each read, we determine the coverage of each base  
538 according to its overlaps. Then, we calculate the minimum coverage ( $c_{min}$ ),  
539 maximum coverage ( $c_{max}$ ) of bases, as well as the difference between minimum  
540 coverage and maximum coverage ( $c_{diff}$ ). If its  $c_{min}$  is less than predefined threshold,  
541  $min\_coverage$ , or  $c_{max}$  is larger than predefined threshold,  $max\_coverage$ , or  $c_{diff}$  is  
542 larger than predefined threshold,  $max\_diff\_coverage$ , the read and its overlaps are  
543 removed. The details on coverage threshold settings are provided in [Supplementary](#)  
544 [Note 9](#). Because of broad error distribution among different reads, we use both global  
545 and local threshold, instead of a single global threshold, for quality control of overlap  
546 identity and overhang. For a high-quality read, the average quality of its overlaps  
547 needs to be higher than global average; therefore, we set the local threshold to filter  
548 out overlaps having relatively low quality. For a low-quality read, the average quality  
549 of its overlaps needs to be lower than global average; we then use the global threshold  
550 to filter out low-quality overlaps for that read. This strategy allows us to filter out  
551 overlaps with relatively low quality for each read, and to maintain the overall quality  
552 of all the overlaps. Details on setting global and local thresholds for overlap identity  
553 and overhang are provided in [Supplemental Note 9](#).

554 **Contig assembly.** Next, we construct a directed string graph and remove transitive  
555 edges using Mayer's algorithm<sup>30</sup>. We mark the best out-edge and the best in-edge of

556 each node based on overlap lengths of the edges. The edges that are not marked as  
557 best out-edge or best in-edge are removed<sup>31</sup>. We also remove ambiguous edges (tips,  
558 bubbles, and spurious links) in the graph. We then identify linear paths from the graph  
559 and generate contigs. When there is a branch, we break the path to generate multiple  
560 contigs. This strategy can reduce the possibility of mis-assembly.

561 **Contig bridging.** During error correction, long reads with high-error subsequences  
562 are cut into multiple shorter reads, which eventually leads to discontinuity of contigs.  
563 It is possible to relink contigs using long raw reads<sup>20</sup>. First, we align the long raw  
564 reads to contigs. Two contigs may have an overlap that is of low quality; this overlap  
565 is filtered before construction of a string graph. A raw read can either fill the gap  
566 between two contigs, which is then called a gap read, or overlap with the overlap of  
567 two contigs, which is then called an overlap read. For each raw read, we record the  
568 gap or overlap length between the mapped positions on the ends of the two contigs.  
569 For each pair of contigs, the raw reads connecting them are grouped as those  
570 connecting in same orientation or those connecting in different orientations. In each  
571 orientation group, we cluster the raw reads based on their gap/overlap lengths. If the  
572 difference between the gap/overlap lengths of two raw reads is less than threshold  
573 (default value is 1000 bp), we assign them into same cluster. And we assigned a score  
574 to each raw read, which is the sum of the products of identity and length of overlaps  
575 between the raw read and the pair of contigs. The read cluster with the largest sum of  
576 scores is chosen as the link for the contig pair.

577           After identifying links between contig pairs, we create a string graph in which  
578 contigs are nodes and links between the contigs are edges. The weight of each edge is  
579 set to the link score. We simplify the graph again by removing transitive edges. Then,  
580 we traverse the graph and identify linear paths as final contigs. A raw read from the  
581 link is selected to fill the gap between contigs.

582 **Error distribution analysis.** We analyzed error distribution in Nanopore datasets for  
583 *E. coli*, *S. cerevisiae*, *A. thaliana*, *D. melanogaster*, *C. reinhardtii*, *O. sativa* and *S.*  
584 *pennellii*. Our results indicate that the sequencing error rate of Nanopore reads was  
585 high at 10-30%, which helped us refine our algorithm for the NECAT platform and  
586 provide insights into why the existing correction algorithms are not suitable for the  
587 correction of Nanopore reads. Details are provided in [Supplementary Note 5](#).

588 **Evaluation.** We compared our error correction tool with those provided in Canu. We  
589 also systematically evaluated the assembly tools provided in NECAT by comparing  
590 them with those of Canu and Canu+smartdenovo. Details of these comparisons are  
591 reported in [Supplementary Notes 6-7,10](#).

592

## 593 **References**

- 594 1. Niranjana, N. & Mihai, P. Sequence assembly demystified. *Nature Reviews Genetics*  
595 **14**, 157-167 (2013).
- 596 2. Gagarinova, A. & Emili, A. Genome-scale genetic manipulation methods for  
597 exploring bacterial molecular biology. *Molecular Biosystems* **8**, 1626 (2012).
- 598 3. Siepel, A. Finishing the euchromatic sequence of the human genome. *Nature* **50**,  
599 931-945 (2004).
- 600 4. Seo, J.S. et al. De novo assembly and phasing of a Korean human genome. *Nature*  
601 **538**, 243-247 (2016).
- 602 5. Michael, T.P. et al. High contiguity Arabidopsis thaliana genome assembly with a  
603 single nanopore flow cell. *Nature Communications* **9**, 541 (2018).
- 604 6. Kuderna, L.F.K. et al. Selective single molecule sequencing and assembly of a human  
605 Y chromosome of African origin. *Nature Communications* **10**, 4 (2019).
- 606 7. Jain, M. et al. Linear assembly of a human centromere on the Y chromosome. *Nature*  
607 *Biotechnology* **36**, 321 (2018).
- 608 8. Weirather, J.L. et al. Comprehensive comparison of Pacific Biosciences and Oxford  
609 Nanopore Technologies and their applications to transcriptome analysis.  
610 *Fl1000research* **6**, 100 (2017).
- 611 9. Chin, C.S. et al. Phased diploid genome assembly with single-molecule real-time  
612 sequencing. *Nature Methods* **13**, 1050-1054 (2016).
- 613 10. Koren, S. et al. Canu: scalable and accurate long-read assembly via adaptive k-mer  
614 weighting and repeat separation. *Genome Research* **27**, 722 (2017).
- 615 11. Xiao, C.L. et al. MECAT: fast mapping, error correction, and de novo assembly for  
616 single-molecule sequencing reads. *Nature Methods* **14** (2017).
- 617 12. Li, H. Minimap and minimiasm: fast mapping and de novo assembly for noisy long  
618 sequences. *Bioinformatics* **32**, 2103 (2015).
- 619 13. Kolmogorov, M., Yuan, J., Lin, Y. & Pevzner, P.A. Assembly of long, error-prone  
620 reads using repeat graphs. *Nature Biotechnology* **37**, 540-546 (2019).
- 621 14. Ruan, J. & Li, H. Fast and accurate long-read assembly with wtdbg2. *Nature Methods*  
622 (2019).
- 623 15. Jayakumar, V. & Sakakibara, Y. Comprehensive evaluation of non-hybrid genome  
624 assembly tools for third-generation PacBio long-read sequence data. *Briefings in*  
625 *Bioinformatics* **20** (2017).
- 626 16. Jain, M. et al. Nanopore sequencing and assembly of a human genome with ultra-long  
627 reads. *Nature Biotechnology* **36**, 338-345 (2018).
- 628 17. Magi, A., Giusti, B. & Tattini, L. Characterization of MinION nanopore data for  
629 resequencing analyses. *Briefings in Bioinformatics* **18**, 940-953 (2016).
- 630 18. Rang, F.J., Kloosterman, W.P. & Ridder, J.D. From squiggle to basepair:  
631 computational approaches for improving nanopore sequencing read accuracy.  
632 *Genome Biology* **19**, 90 (2018).
- 633 19. Li, H. Minimap2: pairwise alignment for nucleotide sequences. *Bioinformatics* **34**  
634 (2017).

- 635 20. Warren, R.L. et al. LINKS: Scalable, alignment-free scaffolding of draft genomes  
636 with long reads. *Gigascience* **4**, 1-11 (2015).
- 637 21. Herman, M.M. et al. Neuroblastic differentiation potential of the human  
638 retinoblastoma cell lines Y-79 and WERI-Rb1 maintained in an organ culture system.  
639 An immunohistochemical, electron microscopic, and biochemical study. *American*  
640 *Journal of Pathology* **134**, 115-132 (1989).
- 641 22. Kurtz, S. et al. Versatile and open software for comparing large genomes. *Genome*  
642 *Biology* **5**, R12 (2004).
- 643 23. Langmead, B. & Salzberg, S.L. Fast gapped-read alignment with Bowtie 2. *Nature*  
644 *Methods* **9**, 357-359 (2012).
- 645 24. Sedlazeck, F.J. et al. Accurate detection of complex structural variations using  
646 single-molecule sequencing. *Nature Methods* **15**, 461-468 (2018).
- 647 25. Layer, R.M., Chiang, C., Quinlan, A.R. & Hall, I.M. LUMPY: a probabilistic  
648 framework for structural variant discovery. *Genome Biology* **15**, R84 (2014).
- 649 26. Yang, H., Robinson, P.N. & Wang, K. Phenolyzer: phenotype-based prioritization of  
650 candidate genes for human diseases. *Nature Methods* **12**, 841 (2015).
- 651 27. Suzuma, K. et al. Characterization of protein kinase C  $\beta$  isoform's action on  
652 retinoblastoma protein phosphorylation, vascular endothelial growth factor-induced  
653 endothelial cell proliferation, and retinal neovascularization. *Proceedings of the*  
654 *National Academy of Sciences* **99**, 721 (2002).
- 655 28. M, Š. & M, Š. Edlib: a C/C++ library for fast, exact sequence alignment using edit  
656 distance. *Bioinformatics* **33**, 1394-1395 (2017).
- 657 29. Myers, G. 52-67 (Springer Berlin Heidelberg, Berlin, Heidelberg; 2014).
- 658 30. Myers, E.W. The fragment assembly string graph. *Bioinformatics* **21 Suppl 2**, ii79  
659 (2005).
- 660 31. Miller, J.R., Delcher, A.L. & Koren, S.V., Eli Aggressive assembly of  
661 pyrosequencing reads with mates. *Bioinformatics* **24**, 2818-2824 (2008).

662

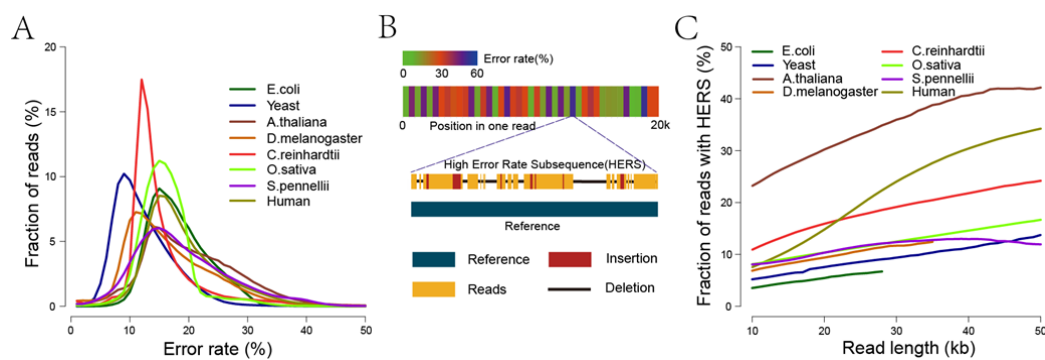

Figure 1

Error characteristics of eight Nanopore raw read datasets. (A) Error rate distribution of raw reads. (B) Error rates of subsequences in a Nanopore read (upper) and illustration of a high error subsequence in the read (bottom). (C) Plot of percentage of raw reads with high error rate subsequences (HERS, error rate more than 50% in 500 bp windows) against read length.

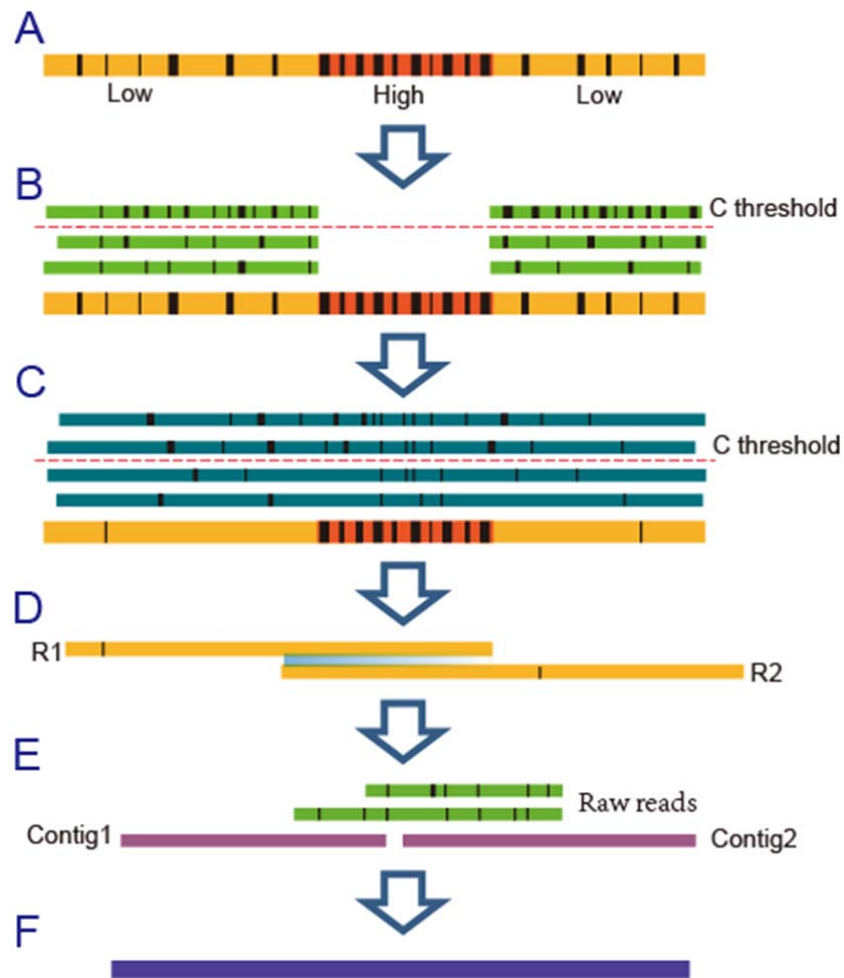

Figure 2

Illustration of progressive error correction and two-stage assembly methods of NECAT. (A) Input raw reads. (B) Error correction of low error rate subsequences. Only low error rate subsequences have supporting reads. (C) Error correction of high error rate subsequences. (D) Contig assembling using corrected reads. (E) Contig bridging using raw Nanopore reads. (F) Output final contigs.



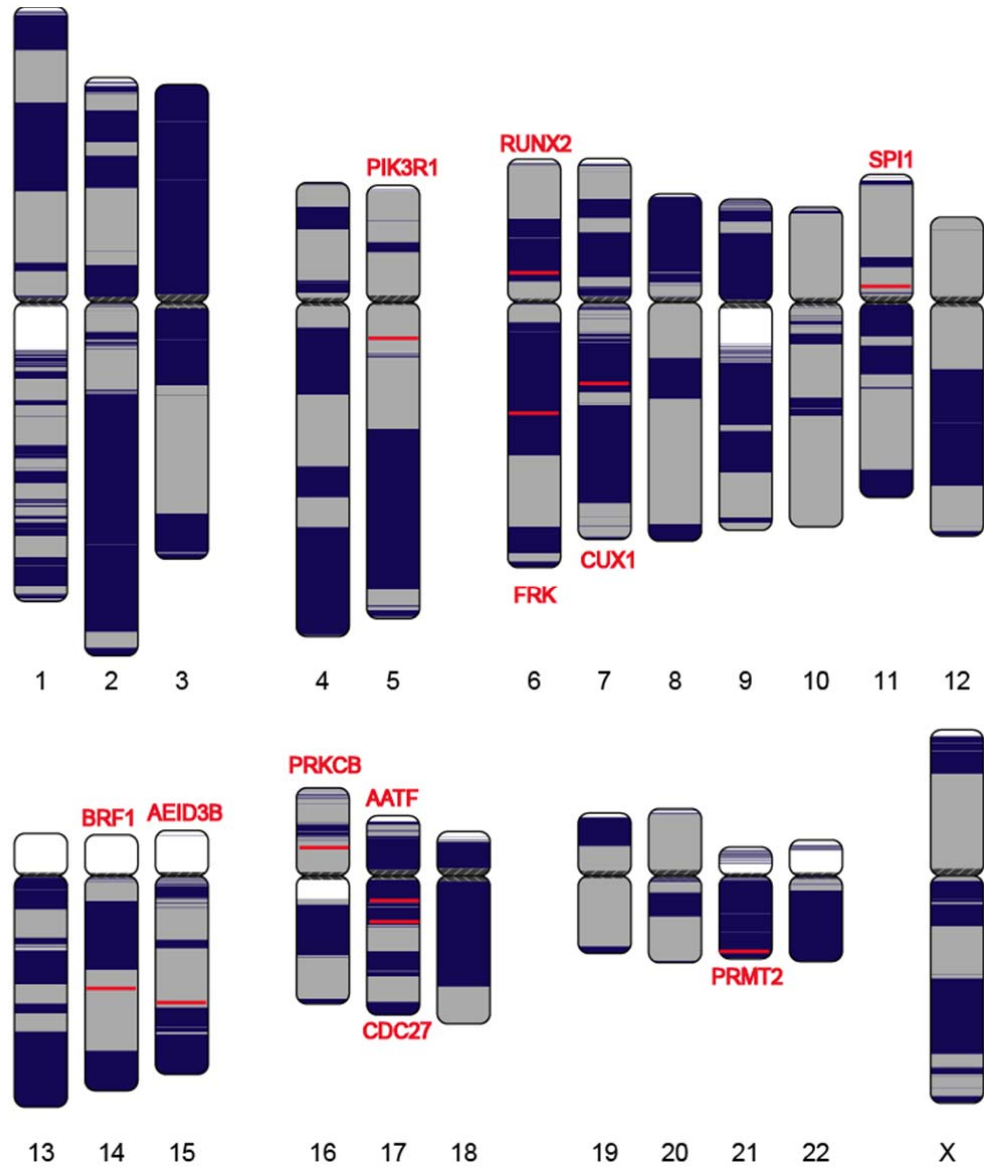

Figure 3

Continuity analysis of the assembly of WERI cell line using Nanopore reads. Human chromosomes are painted with assembled contigs using the ColoredChromosomes package. Alternating shades indicate adjacent contigs (each vertical transition from gray to black represents a contig boundary or alignment breakpoint).

Table 1. Performance comparison of Nanopore read error correction

| Datasets           | Pipeline  | Size(g)/Time(h)<br>/Speed(g/h) | Error<br>rate(%) | <=5%(%)       | N50    | N75    | Read number<br>with HERS |
|--------------------|-----------|--------------------------------|------------------|---------------|--------|--------|--------------------------|
| E.coli             | raw reads | 1.38/--/--                     | 17.8             | 0.01          | 41,074 | 35,484 | 121                      |
|                    | Canu      | 0.22/1.63/0.14                 | 7.06             | 20.45         | 37,747 | 32,127 | 1                        |
|                    | NECAT     | 1.41/0.76/1.86                 | 2.23 (4.27)      | 99.34(80.51)  | 43,140 | 37,502 | 1                        |
| S. cerevisiae      | raw reads | 5.48/--/--                     | 12               | 1.61          | 34,668 | 28,152 | 7,589                    |
|                    | Canu      | 2.18/30.83/0.071               | 3.13             | 87.3          | 10,554 | 4,567  | 4,820                    |
|                    | NECAT     | 4.57/3.90/1.17                 | 1.53 (3.08)      | 95.04(88.09)  | 31,364 | 24,480 | 268                      |
| D.<br>melanogaster | raw reads | 8.30/--/--                     | 16.2             | 2.3           | 17,730 | 13,621 | 12,438                   |
|                    | Canu      | 4.79/18.10/0.26                | 8.15             | 57.57         | 15,220 | 10,658 | 6,523                    |
|                    | NECAT     | 7.52/4.20/1.79                 | 4.89 (7.03)      | 72.03(64.18)  | 17,369 | 13,104 | 3,481                    |
| A. thaliana        | raw reads | 3.08/--/--                     | 20.1             | 1.57          | 23,386 | 16,253 | 14,483                   |
|                    | Canu      | 2.59/12.07/0.22                | 12.0             | 8.09          | 21,472 | 13,133 | 8,722                    |
|                    | NECAT     | 2.85/1.33/2.14                 | 9.01(11.35)      | 45.85(25.67)  | 23,600 | 15,944 | 7,158                    |
| C. reinhardtii     | raw reads | 14.84/--/--                    | 15               | 1.16          | 54,409 | 46,812 | 4,231                    |
|                    | Canu      | 4.61/59.40/0.078               | 5.35             | 76.05         | 53,891 | 45,934 | 726                      |
|                    | NECAT     | 14.89/11.53/1.29               | 1.99(4.40)       | 95.18(82.13)  | 56,427 | 48,708 | 278                      |
| O. sativa          | raw reads | 63.40/--/--                    | 15.6             | 0.49          | 56,325 | 50,847 | 24,205                   |
|                    | Canu      | 15.23/43.20/0.35               | 7.99             | 44.42         | 55,010 | 49,612 | 4,413                    |
|                    | NECAT     | 63.83/18.95/3.37               | 4.66(6.45)       | 74.62 (51.49) | 56,573 | 51,141 | 3,511                    |
| S. pennellii       | raw reads | 132.74/--/--                   | 18.49            | 1.7           | 24,801 | 22,226 | 127,808                  |
|                    | Canu      | 37.53/88.8/0.42                | 9.69             | 34.04         | 21,653 | 19,364 | 5,511                    |
|                    | NECAT     | 121.07/137.77/0.88             | 6.45 (9.23)      | 63.04 (38.77) | 23,810 | 21,480 | 5,445                    |

Size is the total number of base pairs in corrected reads. Time is the time of error correction, and the speed is the Size/Time. Error rate denotes the mean error rate of raw reads and corrected reads; <=5% denotes the percentage of reads with less than 5% error rate in total corrected read, values are the bracket are results of NECAT after the first correction; N50 and N75 are the length of read that reached the 50% and 75% of the total length of all reads; Read number with HERS denotes the number of reads that with at least one HERS (more than 50% error in the 500bp window). The reads that were used in evaluating the last three metrics (N50, N75 and Read number with HERS) of NECAT were corrected from longest 40x of raw dataset that were selected by Canu for correction by default, see Supplementary Note 6 for details.

Table 2. The quality and performance of long-read assembly with NECAT

| Genome                 | Pipeline         | Assembly Size | Contig | NG50 (AP)         | ctg/chr | Correct time | Contig time | Total time |
|------------------------|------------------|---------------|--------|-------------------|---------|--------------|-------------|------------|
| <i>E. coli</i>         | Ref.             | 4641652       | 1      | 4,641,652(100%)   | 1       | —            | —           | —          |
|                        | Canu             | 4601040       | 1      | 4,601,040(99%)    | 1       | 26.1         | 698.1       | 724.2      |
|                        | Canu+Smartdenovo | 4630399       | 1      | 4,630,399(100%)   | 1       | 26.1         | 8           | 34.1       |
|                        | NECAT            | 4594537       | 1      | 4,594,537(99%)    | 1       | 1.6          | 1.2         | 2.8        |
| <i>S. cerevisiae</i>   | S228C            | 12157105      | 17     | 924,431(100%)     | 1       | —            | —           | —          |
|                        | Canu             | 12709122      | 26     | 814,250(88%)      | 2       | 493.3        | 1029.9      | 1523.2     |
|                        | Canu+Smartdenovo | 12404242      | 19     | 814,745(88%)      | 1       | 493.3        | 38.4        | 531.7      |
|                        | NECAT            | 12341147      | 19     | 936,684(101%)     | 1       | 4.4          | 4.9         | 9.3        |
| <i>A. thaliana</i>     | TAIR10           | 119668634     | 7      | 23,459,830(100%)  | 1       | —            | —           | —          |
|                        | Canu             | 113408765     | 288    | 6,522,919(28%)    | 41      | 193.1        | 1229.9      | 1423       |
|                        | Canu+Smartdenovo | 115555194     | 44     | 11,070,615(47%)   | 6       | 193.1        | 125.9       | 319        |
|                        | NECAT            | 122855840     | 136    | 11,157,362(48%)   | 19      | 19.8         | 28.0        | 47.9       |
| <i>D. melanogaster</i> | dm6              | 143726002     | 1870   | 25,286,936(100%)  | 234     | —            | —           | —          |
|                        | Canu             | 146764973     | 499    | 3,508,917(14%)    | 62      | 289.6        | 1259.2      | 1548.8     |
|                        | Canu+Smartdenovo | 135835365     | 162    | 14,456,187(57%)   | 20      | 289.6        | 294.4       | 584        |
|                        | NECAT            | 142774092     | 277    | 18,072,166(71%)   | 35      | 37.7         | 32.7        | 70.4       |
| <i>C. reinhardtii</i>  | Ref. v3.0        | 111098438     | 53     | 7,783,580(100%)   | 3       | —            | —           | —          |
|                        | Canu             | 116421921     | 93     | 4,563,858(59%)    | 6       | 950.4        | 17369.6     | 18320      |
|                        | Canu+Smartdenovo | 109704543     | 46     | 4,498,347(58%)    | 3       | 950.4        | 816         | 1766.4     |
|                        | NECAT            | 113388358     | 54     | 6,168,830(79%)    | 3       | 54.8         | 47.0        | 101.8      |
| <i>O. sativa</i>       | Ref.v4.0         | 382778125     | 15     | 30,828,668(100%)  | 1       | —            | —           | —          |
|                        | Canu             | 383923158     | 385    | 5,041,373(16%)    | 26      | 2768.0       | 16800.0     | 19568.0    |
|                        | Canu+Smartdenovo | 366402510     | 229    | 3,586,246(12%)    | 15      | 2768.0       | 1926.3      | 4694.3     |
|                        | NECAT            | 373120604     | 120    | 9,650,275(31%)    | 8       | 186.9        | 330.3       | 517.2      |
| <i>S. pennellii</i>    | Ref. v1.0        | 915596307     | 899    | 2,521,711(100%)   | 69      | —            | —           | —          |
|                        | Canu             | 961827720     | 2010   | 1,663,626(66%)    | 155     | 5733.1       | 15398.4     | 21131.5    |
|                        | Canu+Smartdenovo | 915596307     | 899    | 2,521,711(100%)   | 69      | 5733.1       | 2510.2      | 8243.4     |
|                        | NECAT            | 991792915     | 1344   | 4,801,589(190%)   | 103     | 799.6        | 1740.7      | 2540.3     |
| <i>Human NI2878</i>    | Ref38            | 3006872676    | 25     | 159,345,973(100%) | 1       | —            | —           | —          |
|                        | Canu             | 2759020457    | 2337   | 6,636,211(4%)     | 102     | —            | 60,000      | 60,000     |
|                        | NECAT            | 2798424597    | 1494   | 16,151,971(10%)   | 65      | 3,947.7      | 3,276.8     | 7,224.5    |

Assembly size is the total number of base pairs in all contigs generated by assemblers. NG50 indicates that 50% of reference genome size was contained in contigs having length  $\geq N$ . Assembly performance (AP) is defined as obtained contig NG50 divided by NG50 of reference assembly. The genome sizes of *E. coli*, *S. cerevisiae* W303, *A. thaliana* Col-0, *D. melanogaster* ISO1, *C. reinhardtii*, *O. sativa*, *S. pennellii* and human were 4,641,652, 12,157,105, 119,668,634, 143,726,002, 111,098,438, 382,778,125, 915,596,307, and 3,006,872,676, respectively. Ctg/Chr is the average number of contigs per chromosome in the assembly. All the pipelines were tested on the same computer with 2.0 GHz CPU and 3T GB RAM of memory. For the first five datasets, we ran all the pipelines on our computer with 32 threads; the correction and contig computational time of the pipelines were recorded. For *O. sativa*, *S. pennellii* and the human dataset, we ran all pipelines on our computer with 64 threads, and correction and contig computational time were recorded. The *S. pennellii* assemblies by Canu and Canu+Smartdenovo are acquired from <https://www.plabipd.de/portal/solanum-pennellii>, NG50 of which were longer than those generated by us. The human assembly and running time of canu are acquired from public paper.

Table 3

Performance of de novo assemblies before and after the bridging step of NECAT.

| Species                         | Stats  | Count | Assembly Size | Max      | Min     | N25      | L25 | N50      | L50 | N75     | L75 |
|---------------------------------|--------|-------|---------------|----------|---------|----------|-----|----------|-----|---------|-----|
| <i>E. coli</i>                  | Before | 1     | 4587234       | 4587234  | 4587234 | 4587234  | 1   | 4587234  | 1   | 4587234 | 1   |
|                                 | After  | 1     | 4594537       | 4594537  | 4594537 | 4594537  | 1   | 4594537  | 1   | 4594537 | 1   |
| <i>S. cerevisiae</i>            | Before | 20    | 12344710      | 1529545  | 37657   | 1087952  | 3   | 816246   | 6   | 581125  | 10  |
|                                 | After  | 19    | 12341147      | 1529022  | 37657   | 1087471  | 3   | 936684   | 6   | 676549  | 10  |
| <i>A. thaliana</i>              | Before | 150   | 122876764     | 14555777 | 4312    | 14075240 | 3   | 11149925 | 5   | 6575909 | 8   |
|                                 | After  | 136   | 122855840     | 14566553 | 4312    | 14083693 | 3   | 11157362 | 5   | 7804579 | 8   |
| <i>D. melanogaster</i>          | Before | 320   | 143000842     | 14922625 | 1303    | 12854107 | 3   | 9612127  | 6   | 2092117 | 14  |
|                                 | After  | 277   | 142774092     | 21505040 | 1303    | 21396663 | 2   | 18072166 | 4   | 2925305 | 9   |
| <i>C. reinhardtii</i>           | Before | 64    | 113293301     | 8997060  | 4161    | 6803426  | 4   | 5455837  | 9   | 3263676 | 16  |
|                                 | After  | 54    | 113388358     | 9014332  | 4161    | 6812997  | 4   | 6168830  | 8   | 3374959 | 15  |
| <i>O. sativa Japonica Group</i> | Before | 167   | 372698321     | 22007406 | 3978    | 11903975 | 7   | 6099041  | 18  | 3370103 | 38  |
|                                 | After  | 118   | 373827003     | 22086005 | 7816    | 13530842 | 6   | 10323607 | 14  | 5860244 | 25  |
| <i>S. pennellii</i>             | Before | 1604  | 991874379     | 22857416 | 508     | 5921037  | 27  | 3465614  | 82  | 1668679 | 186 |
|                                 | After  | 1344  | 991792915     | 22878582 | 508     | 6804220  | 22  | 4325703  | 67  | 2075284 | 151 |
| Human                           | Before | 2151  | 2791598215    | 50857421 | 500     | 26709700 | 19  | 15339800 | 55  | 7002196 | 124 |
|                                 | After  | 1494  | 2798424597    | 73247802 | 500     | 31103549 | 15  | 16933776 | 47  | 8828295 | 102 |

Count is the total number of contigs in assembly. Assembly size is the total number of base pairs in assembly. N25/N50/N75 indicate that 25%/50%/75% of the assembly size is contained in the contigs of length  $\geq N$ . The L25/L50/L75 are the number of contigs under the N25/N50/N75, respectively.
